# Supplementary material for: Construction and validation of prognosis and treatment outcome models based on plasma membrane tension characteristics in bladder cancer
Source: PeerJ. 2025 Jan 6;13:e18816. doi: 10.7717/peerj.18816 (PMC11716045; doi:10.7717/peerj.18816)
Supplement: Supplemental Information 9 — original data [file peerj-13-18816-s009.xlsx]

## Sheet: Sheet1
	Normal			Tumor
#group1	0.921949	1.05698	1	1.47752	1.78193	1.31633
#group2	0.512699	1.09831	1	3.17612	2.99472	3.24993
#group3	1.0094	1	0.505467	2.32471	2.2317	1.70984
#group4	1	1.03571	0.984623	1.19873	1.40749	1.2197
#group5	0.972599	1.0138	1	2.36008	2.22272	1.9079
#group6	1	0.98833	1.07858	3.29844	2.8158	2.83279
#group7	1.06162	0.956109	1	5.87613	4.00988	3.95385
#group8	1.04901	0.568087	1	2.78943	2.33542	2.92775
#group9	1.78324	0.722637	1	3.34391	2.45855	4.06567
#group10	1.37122	0.995218	1	3.08753	2.40484	2.29728
