# Supplementary material for: Construction and validation of prognosis and treatment outcome models based on plasma membrane tension characteristics in bladder cancer
Source: PeerJ. 2025 Jan 6;13:e18816. doi: 10.7717/peerj.18816 (PMC11716045; doi:10.7717/peerj.18816)
Supplement: Supplemental Information 10 [file peerj-13-18816-s010.xlsx]

## Sheet: Sheet1
	Si-NC			SiDCBLD2#1			SiDCBLD2#2
T24	1.09735	0.892834	1	0.241437	0.238319	0.184561	0.0875345	0.0999923	0.0850494
BIU	1	0.975335	1.20835	0.176322	0.180667	0.236969	0.0703038	0.0594519	0.0476184
