# Supplementary material for: Construction and validation of prognosis and treatment outcome models based on plasma membrane tension characteristics in bladder cancer
Source: PeerJ journal article supplement (doi:10.7717/peerj.18816), 2025-01-06

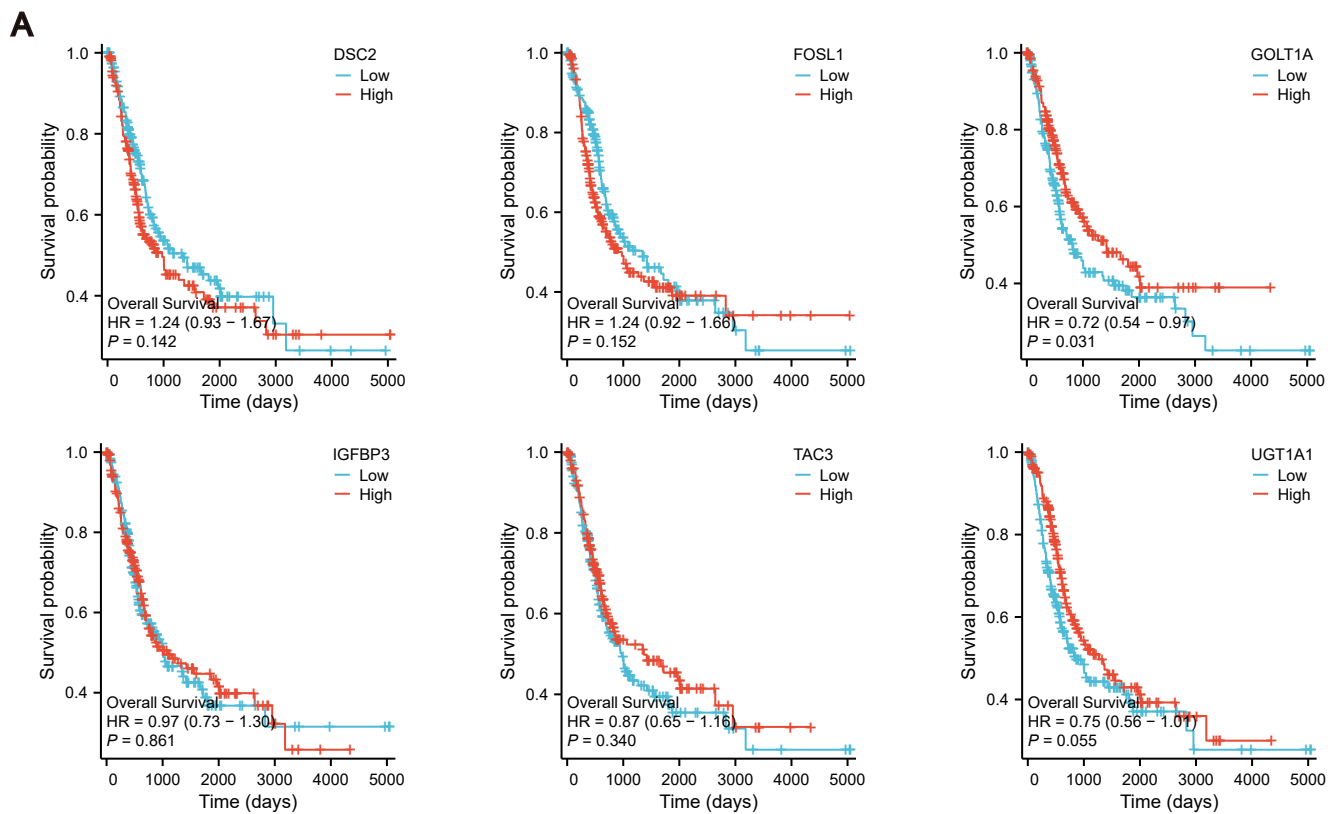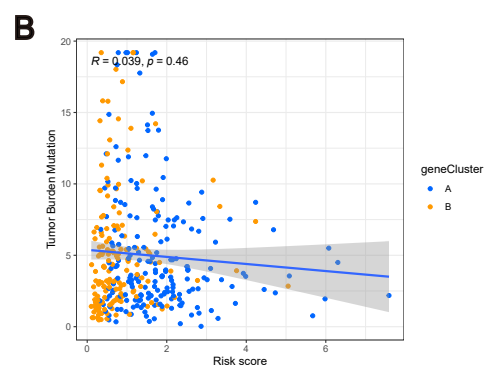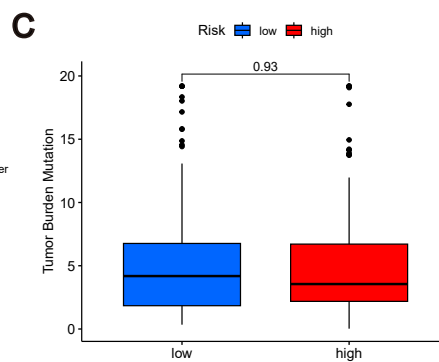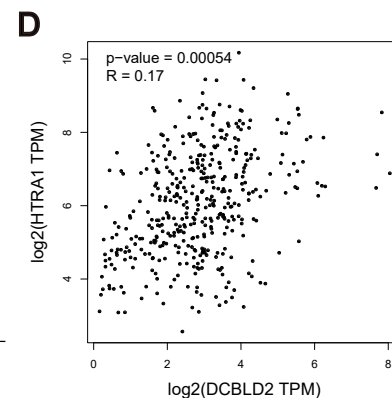

Supplement: supplementary_figure_4.pdf [file supplementary_figure_4.pdf]
