# Supplementary material for: Construction and validation of prognosis and treatment outcome models based on plasma membrane tension characteristics in bladder cancer
Source: PeerJ. 2025 Jan 6;13:e18816. doi: 10.7717/peerj.18816 (PMC11716045; doi:10.7717/peerj.18816)
Supplement: Table S1 [file peerj-13-18816-s005.xlsx]

## Sheet: Sheet1
41 plasma membrane tension-related genes
ACAP2
AMPH
ARFIP1
ARFIP2
BAIAP2
BIN1
FBP17
FCHO1
FCHO2
FNBP1L
GRAF1
ICA69
NOSTRIN
PABPC4
PACSIN1
PACSIN2
PACSIN3
PACSYN2
PICK1
PSTPIP1
PSTPIP2
SH3GL1
SH3GL1P1
SH3GL1P2
SH3GL1P3
SH3GL2
SH3GL3
SH3GLB1
SH3GLB2
SNX1
SNX2
SNX3
SNX4
SNX5
SNX6
SNX9
SRGAP1
SRGAP2
SRGAP3
TRIP10
XPNPEP2
