# Supplementary material for: Construction and validation of prognosis and treatment outcome models based on plasma membrane tension characteristics in bladder cancer
Source: PeerJ. 2025 Jan 6;13:e18816. doi: 10.7717/peerj.18816 (PMC11716045; doi:10.7717/peerj.18816)
Supplement: Table S2 [file peerj-13-18816-s006.xlsx]

## Sheet: Sheet1
id	HR	HR.95L	HR.95H	pvalue	km
AMPH	1.27773	1.08115	1.51005	0.00403573	8.75e-05
SH3GL1	1.19799	0.935194	1.53462	0.152808	0.0545131
SH3GL2	0.947669	0.86705	1.03578	0.236049	0.00167916
SH3GL3	1.11142	0.96745	1.27681	0.135583	0.0149496
SH3GLB1	1.14337	0.883538	1.47961	0.308393	0.0879058
SH3GLB2	0.840718	0.730581	0.967459	0.0154464	0.000618937
SH3GL1P2	0.711256	0.475504	1.06389	0.0972163	0.0245209
FCHO1	0.974025	0.862761	1.09964	0.670657	0.0173555
FCHO2	0.938834	0.771636	1.14226	0.528204	0.0112496
SNX9	1.07718	0.881443	1.31639	0.467449	0.00402454
PACSIN1	1.00758	0.890077	1.1406	0.904979	0.0630997
PACSIN2	1.0394	0.825542	1.30866	0.742303	0.195452
PACSIN3	1.19998	1.00947	1.42646	0.0387552	0.00875799
PSTPIP1	0.912603	0.790458	1.05362	0.212224	0.00612337
PSTPIP2	0.990281	0.861662	1.1381	0.890572	0.0777017
PICK1	0.682874	0.52421	0.889562	0.00469269	0.00310173
ARFIP1	0.831696	0.677416	1.02111	0.0783422	0.0147344
ARFIP2	1.07438	0.874011	1.32068	0.495711	0.00273225
BAIAP2	1.44984	1.25952	1.66892	2.3e-07	2.76e-06
FNBP1L	0.974321	0.845146	1.12324	0.719983	0.0736091
SRGAP1	1.22181	0.995066	1.50022	0.0557814	0.0172296
SRGAP2	1.69166	1.34953	2.12052	5.11e-06	1.18e-05
SRGAP3	0.852744	0.705909	1.03012	0.0985	0.0125356
NOSTRIN	0.895889	0.729245	1.10061	0.295108	0.0687845
SNX1	1.00713	0.806611	1.2575	0.949988	0.0728438
SNX2	1.22424	1.01295	1.4796	0.0363458	0.0250915
SNX4	1.07407	0.889875	1.2964	0.4566	0.0523996
SNX5	1.16259	0.933437	1.448	0.178628	0.000766397
SNX6	1.21658	1.00182	1.4774	0.0478988	0.00148355
PABPC4	1.01993	0.856536	1.2145	0.824642	0.232002
XPNPEP2	1.03231	0.903715	1.17921	0.639419	0.00519679
TRIP10	1.06096	0.872429	1.29024	0.553299	0.093735
ACAP2	1.20998	1.00205	1.46107	0.0475644	0.00335398
BIN1	1.05004	0.95778	1.15119	0.298038	0.0254754
