# Supplementary material for: Construction and validation of prognosis and treatment outcome models based on plasma membrane tension characteristics in bladder cancer
Source: PeerJ. 2025 Jan 6;13:e18816. doi: 10.7717/peerj.18816 (PMC11716045; doi:10.7717/peerj.18816)
Supplement: Table S3 [file peerj-13-18816-s007.xlsx]

## Sheet: Sheet1
BIN1	VIPR1	TFPI2	ZNF440	KLF9
CAVIN1	RGS20	RNASE1	TMCC3	PLPP4
ITGA5	PODNL1	TBX1	WAS	PRRX2
GLIPR1	HEG1	SBK1	GPR176	TENM2
PIK3CD	BTBD16	FGFBP1	TGFB1I1	SECTM1
MT2A	EMILIN1	EHF	HK3	ANGPTL2
NCF2	LAMA4	CXCL5	PTPN7	P2RY6
FLNA	SPAG4	HLA-DRA	SLC16A1	TIMP1
TNC	CYP4F12	CYP3A5	ERBB3	VGLL1
EMP3	TWIST1	HCP5	PIK3AP1	BATF2
MSN	CCN4	SFRP4	SCNN1B	TMEM184A
TRAK1	TAGLN	PALM3	TMPRSS2	NT5E
SNX31	TMC7	TRIM22	ERICH5	NECTIN4
GFPT2	PPM1H	SPP1	AEBP1	ANTXR2
OSMR	CD82	IFI44	MN1	COL3A1
TOX3	CAPS	COL10A1	CDC25B	CAV2
UPK2	LAPTM5	SERPINE1	GPX8	TNFRSF21
AHNAK2	TPM1	APOE	SLC7A7	HLA-DPB1
CHST15	FOXQ1	HES2	CSF1	TAP1
MPP1	SRMS	BHLHE41	CDK6	TNFRSF18
GPR68	ANXA6	HLA-DRB6	ADAMTS2	PLA2G7
PDLIM7	CTSB	PLAAT4	DSE	DCBLD2
NEK6	S100A5	KRT8	MS4A4A	DPT
MYO1G	ISLR	KRTCAP3	PDPN	THY1
FPR1	DPYSL3	COL7A1	IL32	UGT1A1
SIRPA	SERPINB9	ZNF737	SLC9A2	LTB
C1orf162	RRAD	MMP11	PLAUR	KLK10
CYTH4	CD248	SERPINB13	COL5A3	SLC27A2
WIPF1	FILIP1L	HLA-B	C5AR1	RAB25
PPARG	S100A10	TH	NR3C1	HLA-F
IFITM3	SSH3	CAMK2N1	APCDD1L	IL20RB
PPFIBP2	PDGFRB	ID1	EDNRA	CD8A
AXL	PLEKHA6	CD74	GRHL3	PLAU
LILRB3	KRT20	LMOD1	IL2RA	ANPEP
SPHK1	CD44	PRR15L	C1QC	CTSK
CD14	SERPINB1	IFI6	C1QB	HLA-DQA1
TMEM131L	MRC2	ANXA3	SOD2	NTN1
SCNN1G	TBC1D10C	LUM	CYTIP	COL1A2
PRXL2C	DDR2	SCUBE2	MS4A6A	NIPAL1
CORO1C	SLC30A2	LRATD1	SRPX	PITX1
ACTN1	CDA	KRT81	VMO1	CPA4
TGFB3	GREM1	HLA-DRB1	SNAI1	IFIT3
TGFBI	IL1R2	TUBA4A	MFAP3L	PTX3
ALOX5AP	IFI27L2	ANKRD65	DPYD	CXCL12
PLEKHO2	OLFML2B	COL8A1	CTLA4	CPA3
NRP2	ZBP1	LYZ	CYP4B1	CNN1
SLC44A3	NUAK1	CASQ2	DEGS1	MT1A
PTGS1	ELF5	CDH26	GAS6	RAC2
TNFAIP8L3	KCTD12	CRH	ABI3	FNDC1
CD109	COL6A3	EGR1	GPR160	THBS1
COPZ2	SOCS3	PDZK1IP1	FER1L4	CRACR2B
SULF2	DAPK1	MYCN	BIN2	MAMDC2
DOK2	GATA3-AS1	FBLN2	LYPD6	MMP3
BCAT2	AATBC	COL11A1	IRF8	EPSTI1
RAB3IL1	GZMH	FBXO27	PAPSS2	B3GNT3
GNB4	LRIG1	IFI27	DOCK2	RIPPLY3
ARSI	PTHLH	RBPMS2	BNC1	PRNP
GLIPR2	ADA	SORBS1	SERPINA1	COL15A1
AIF1	CRB3	PNMT	LILRB2	TESC
VSIG4	PSMB9	MAL2	TYMP	CCDC8
ITGB2	INHBA	SERPINB3	SRGN	PI3
RNF128	LAMA3	CXCL8	PARVG	HSD17B2
ROR2	PPP1R3C	CCL19	LILRA5	KRT7
PPP1R18	CD3E	PCP4L1	ATP8B1	CXCL9
KIRREL1	BAMBI	CTSE	SIGLEC1	SLFN11
FKBP5	SAA1	HSPB6	TBXAS1	VCAN
COL6A2	SLC2A3	PTGIS	FGL2	ACSL5
DNAJB5	CCL21	HS3ST6	CLIC4	FABP6
HCK	ATF7IP2	S100A3	RAMP1	KRT14
STX2	NUAK2	GDF15	GNLY	OLFML2A
ITPRIP	MSX2	DHRS9	MFGE8	TLE2
SPI1	PLS1	PPP1R14C	PSCA	ANXA9
CAVIN3	POF1B	ERP27	DEGS2	MECOM
CAV1	RALGAPA2	S100A9	CCL8	GSDMC
LAT2	SELENOM	RHCG	CYP2J2	SLC9A4
KATNAL1	EVA1C	CD24	THEM6	S100A8
CD86	PCOLCE2	PODXL2	TPM2	CPXM2
HAVCR2	PKDCC	CALB2	TMEM158	BTG2
TBX3	CCL13	MUC20	TRPV2	ANXA1
FCGR2A	PM20D1	C1orf116	CST7	LCP1
EHD2	TSPAN12	KLK5	PMEPA1	C4orf19
RUNX3	MFAP5	SFRP1	GYPC	GBP1
ZNF823	MYL9	SPON1	PHF19	LDLR
NCKAP1L	CPVL	COMP	G0S2	TMEM45B
DHRS2	DGAT2	DSC2	LINC00885	CCL5
TNFAIP6	VSNL1	HLA-DRB5	TSPAN6	TMEM176A
TUBB6	TREM1	SPRR2A	RHOU	PKIA
COL16A1	HLA-DMB	CCL11	IFITM2	ME1
CALD1	CD70	SHH	CPXM1	SAMD9L
FYB1	DSG3	IFI44L	GPR183	ENTPD3
RBBP8NL	TREM2	MMP12	RASAL3	TNNC1
WARS1	BMP3	AREG	CD300A	RASL12
EFEMP1	SCARF2	ADGRF1	SNCG	SAMD9
FAM3B	KCNMB1	HAS3	LAIR1	IER3
CLMP	MEDAG	GABBR2	HID1	ADAMDEC1
AOAH	UBE2E2	GDPD2	HTRA3	ACTG2
CSF1R	FCRLB	EREG	NIBAN1	C3
TSPAN4	TENT5B	KRT19	PDGFC	TM4SF1
SLA	CAB39L	PCP4	SLC15A3	ALDH2
PDCD1LG2	CD274	SLC44A4	MELTF	RHPN1
VSIG2	S100P	IGFBP3	BCAS1	SULT2A1
BTK	SEMA6A	EPHB6	MPEG1	DES
HAPLN3	CXCL1	GPX3	OLFML3	TNFAIP2
C1R	ILDR1	KLK6	FLNC	BGN
IL7R	HMGA2	THBS2	ITGAM	CDH11
SERPING1	BEND5	KLK7	MMP9	ACTA2
TLR1	BIRC3	CD79A	TMEM97	L1CAM
NNMT	IL12RB2	MYH11	SLC39A14	TNS1
MNDA	AK4	FGFR3	SLCO2B1	FIBIN
FAM174B	EVPL	SPRR2E	RBP1	PCSK9
KLHL5	TNFAIP3	PVALB	CNGA1	CNTN1
ANXA5	MYO1B	GSTM2	INA	MARCO
SAMSN1	EVA1A	KRT16	SEMA5A	CILP
STAB1	TJP3	FDCSP	IGFBP6	PLN
TEAD4	FKBP10	CDH3	LY86	ASPN
CD300LF	PRR15	KLHDC7B	TRPS1	HSPB7
CD209	IL2RB	CCL20	CD38	FXYD4
C2orf15	PLK2	MSLN	RASA3	EEF1A2
MAP3K20	CXCL11	MFAP4	TGM2	LAMC2
IL10RA	KRTAP5-9	PNCK	GZMA	PHGR1
CYB5A	UPK3A	S100A7	HCST	TMEM125
IL15RA	PRR36	MAN1C1	MCF2L-AS1	RAPGEFL1
CD53	EGR2	ARL14	SPINK1	SERPINF1
HMGCS2	ADAMTS4	IGFBP5	GAREM1	CAPN13
FOXA1	GEM	MMP1	NXN	HLA-DQB1
NEXN	HEPH	AKR1C3	MSC	UCHL1
GGT6	GPD1L	SPINK4	SPON2	CRTAC1
GATA3	MAOB	FOXJ1	TEKT5	EMP1
UPK1A	TMEM163	TAC3	RNASE2	GATA2
JAZF1	CXCL13	DSC3	SLC16A2	KRT5
RAB15	EMX2	UPK1B	PRF1	FOSL1
LCP2	CYP4F8	MSMB	CCL4	SLITRK6
PALLD	MAOA	SLPI	LAG3	CSF3
PARVB	OVGP1	PADI3	CXADR	CLDN4
CYBB	CASQ1	MMP7	DTX4	HAS2
PRRX1	DPYSL2	OLR1	COL5A2	SERPINB4
C1S	JPH2	MYEOV	LOX	SPARC
FAS	IDO1	GABRP	MARVELD1	BCAT1
FAP	C1QTNF1	COL17A1	MYADM	TGM1
OSCAR	ZCCHC24	TFF2	COL5A1	GPX2
LRRC25	SIGLEC15	ALDH1A1	SFRP2	SERPINB2
FAM20A	GPRC5C	SYT8	FSTL3	LIMCH1
FCER1G	OXCT1	MAL	GPC6	POU5F1
SASH3	IL6	SPRR1B	LGALS1	MYC
CHST11	TNFSF9	SBSN	MSR1	MRGPRF
ACOX1	CCN2	ANXA10	SPN	SNAI2
LY96	TMEM45A	FAM83A	CGN	LRRC15
TNFSF13B	PTPRR	CAPNS2	CMKLR1	HLA-DPA1
BCL2A1	CCN1	CLCA2	FBN1	AIM2
MYCL	RCN3	CYP1A1	TNFAIP8L2	COL12A1
ACP6	IL27RA	TNNI2	TMC4	STMN3
ICAM1	PCDH7	CLCA4	CD7	ACTC1
MT1X	F13A1	S100A2	SLC14A1	IFIT2
FPR3	LRRC32	TFF1	ELF3	PLOD2
CD300C	CXCL10	GSTM1	EVI2B	ARHGEF4
RAB31	SORCS2	CALML5	GAS1	SOD3
CYP4F22	IL2RG	ADIRF	OR7E91P	SERPINB7
REEP6	STAT1	TOMM6	SPEG	SOX9
STING1	CHRDL2	C19orf33	BLVRA	GDPD3
FMO9P	ADAM12	RN7SK	COL18A1	MOXD1
ARHGAP9	CD52	GBP5	COL8A2	RARRES2
ARFGEF3	MCUB	PRDM1	FCGR1A	SGK2
COL6A1	ADAMTSL4	SELPLG	MSRB3	MAFB
THEMIS2	COLEC12	SLC29A3	NKG7	KRT6C
FBP1	RGS4	SORL1	SLAMF8	CTSG
C1QA	CDH23	POSTN	MT1M	DUSP1
GZMB	CLDN23	S100B	CRYAB	SLC38A5
F3	RNF223	LYPD6B	EIF5A2	MMP2
CCDC80	ST3GAL5	SLC43A3	PLEKHG6	FAM3D
ZNF552	MT1G	COL1A1	PILRA	FOLR2
KLHDC7A	DCN	ATP1A4	CYBRD1	MRC1
ARSJ	UBE2L6	RASSF4	ARL4C	RGS1
BHMT	CRISPLD2	ALDH5A1	SUGCT	ISG20
LST1	HERC5	VIM	MYLIP	FERMT2
CD163	CXCL2	TIMP2	SERPINE2	GOLT1A
CTHRC1	CLEC2B	WNT5B	OSM	CD37
STOM	FA2H	PLA2G2F	CSPG4	PLEKHH1
GFOD1	CCL2	EPN3	RGS2	SSC5D
PLEK	IFI16	NFIX	TCF7L1	NLRC5
RRAS	LMCD1	RAP1GAP	SULF1	BICDL2
ACER2	SYNM	HTRA1	FCGR3A	MAF
FERMT3	FHL1	ECM1	RHBG	FMOD
RNASE6	P2RX1	PLEKHO1	CEBPA	TRIM47
IGF2BP2	SGK1	JAML	IDH1	TM7SF2
C3AR1	MXRA8	SMIM3	SPTSSB	FN1
PDLIM4	CD2	MAP1B	ZBED2	RADX
TYROBP	CASP1	PLEKHA4	PDLIM3	KRT6B
CAPN5	TBX2	CORO1A	SLC22A3	CYP4Z2P
IFITM1	SUSD3	IGSF6	ANXA2	SRCIN1
BAG2	PCOLCE	GLT8D2	CLCF1
SIGLEC10	CCL18	NFIL3	GIMAP4
