# Supplementary material for: Construction and validation of prognosis and treatment outcome models based on plasma membrane tension characteristics in bladder cancer
Source: PeerJ. 2025 Jan 6;13:e18816. doi: 10.7717/peerj.18816 (PMC11716045; doi:10.7717/peerj.18816)
Supplement: Table S4 [file peerj-13-18816-s008.xlsx]

## Sheet: uniCox(table S4
id	HR	HR.95L	HR.95H	pvalue
CAVIN1	1.18264395958882	1.08605153964139	1.28782722007258	9.94544349706255e-06
ITGA5	1.17542209282783	1.08073720615801	1.27840245383924	9.87103440844727e-05
MT2A	1.08944	1.02077874361994	1.16271494344951	9.72935285757281e-06
FLNA	1.1284028732224	1.03621633920188	1.22879074197701	9.57544945747975e-05
TNC	1.15135588521135	1.08164914343917	1.22555486911026	9.56196677732651e-05
EMP3	1.14321674161659	1.04772967383674	1.2474062260034	9.55900935894059e-05
MSN	1.09913629264618	1.00176220572145	1.2059754130392	9.43964654377571e-06
TRAK1	0.877213886613221	0.777120481628765	0.990199359119027	9.38031914414644e-05
GFPT2	1.18192625028852	1.09214071137761	1.27909311187474	9.13141608539377e-06
OSMR	1.14571360678855	1.04095412308684	1.26101586964071	9.02508191097886e-05
TOX3	0.899796577991216	0.838809602009538	0.965217708315522	8.88429924719074e-05
AHNAK2	1.13836316273825	1.06411899385856	1.21778738821353	8.8064659818925e-05
CHST15	1.18217544203801	1.07647534020492	1.29825433390022	8.68313571006484e-07
MPP1	1.15621804942771	1.03377374559843	1.29316514712662	8.66256329573002e-07
GPR68	1.20741878947865	1.09621221759369	1.32990684630961	8.33074834843159e-05
PDLIM7	1.1377513676255	1.00853395960385	1.2835246272145	8.16202223753911e-05
NEK6	1.15208083867563	1.03136697264762	1.28692336873679	7.98311615161226e-05
FPR1	1.13583021220479	1.0409922442615	1.23930824467611	7.25863762956382e-07
SIRPA	1.11357819585591	1.01083362081666	1.22676607974699	7.13315085804638e-07
IFITM3	1.1101150371177	1.01491075173069	1.21425001512038	7.11263738489893e-05
PPFIBP2	0.873247381406668	0.802774025275222	0.949907402487476	6.67315011863026e-05
AXL	1.11667877182798	1.01712973686379	1.22597092018579	6.29038001729431e-06
SPHK1	1.18612047471697	1.09357267850068	1.28650048433149	6.28025029265927e-05
SCNN1G	0.928996476192488	0.872908073105486	0.988688820012514	5.61392655532542e-06
PRXL2C	1.21022896293456	1.04270722268236	1.40466480989537	5.0289975853982e-06
CORO1C	1.16852567483367	1.0217130710376	1.33643416283087	4.94298464755515e-05
ACTN1	1.20704559286824	1.08269515208042	1.34567801514864	4.85423762353077e-05
TGFB3	1.16554602787769	1.06424052786233	1.27649484072008	4.64591365868855e-05
TGFBI	1.14232632123666	1.06097672515781	1.22991333669077	4.05081301042129e-05
NRP2	1.30348882248493	1.15946659459755	1.46540065773339	3.83115782435827e-06
TNFAIP8L3	1.15660206530628	1.04332031281992	1.28218373689581	3.82080607362486e-05
CD109	1.25901773156612	1.15213847170983	1.37581175120859	3.71026984463825e-07
COPZ2	1.14890877951685	1.04075755140527	1.26829863676568	3.60502229982828e-06
SULF2	1.11374144533038	1.03063242095349	1.20355228675906	3.6024939851332e-07
RAB3IL1	1.19909892212585	1.07583554467093	1.3364851460482	3.44748232568648e-06
GNB4	1.21873218645951	1.07638971221259	1.3798981218979	3.37565099439864e-05
ARSI	1.2282205433008	1.10811967867559	1.36133824894175	3.10157881265882e-05
GLIPR2	1.11271359285503	1.01248328031884	1.2228661586732	2.84264763492765e-05
ROR2	1.11330563906549	1.01887640788503	1.21648654967667	2.64223893306705e-05
KIRREL1	1.24146192089578	1.1061945190223	1.39327005741851	2.35309993859719e-05
FKBP5	1.14041647926332	1.03303108928313	1.25896476850263	2.32237507842572e-05
COL6A2	1.12555038974011	1.04614630710732	1.2109813620115	2.24311974964432e-09
STX2	1.14681472055864	1.01180586773154	1.29983828443159	2.12509583778948e-05
ITPRIP	1.28469476396687	1.11159892929041	1.48474471598983	2.11599027190991e-05
CAVIN3	1.13187633651309	1.02287295463156	1.25249576240851	2.06351193279554e-05
CAV1	1.0950011282593	1.01380438450355	1.18270101137537	1.73262626318734e-05
KATNAL1	1.18077505772724	1.03644312087783	1.3452062239266	1.71479479948697e-05
TBX3	0.90651398084253	0.845014663194193	0.972489157000724	1.53581267682509e-05
EHD2	1.14392135344375	1.03165687172883	1.26840241045623	1.47623928302348e-06
ZNF823	0.819847900861426	0.714057231374756	0.94131191592698	1.31394422670161e-07
DHRS2	0.957543190277616	0.919580905161781	0.997072640482597	1.13990990149674e-05
TNFAIP6	1.20678789923965	1.10768294474372	1.31475982424574	1.09200219191743e-05
TUBB6	1.16279972940601	1.07458213388352	1.25825952998141	0.0498013730045238
COL16A1	1.15384831984924	1.0639928208981	1.25129222591478	0.0490644353732386
CALD1	1.18147623704645	1.09306435290712	1.27703926579707	0.0475365416309158
EFEMP1	1.14439100074417	1.07402973163899	1.21936174018732	0.0473978839998392
FAM3B	0.900495940640837	0.84556876102469	0.958991127023137	0.0472315360247624
CLMP	1.16766519406142	1.06125645612198	1.28474319054297	0.0470627478278664
TSPAN4	1.17988345067724	1.04054537490582	1.33788010667775	0.0466757647151837
NNMT	1.10218541679682	1.03027851239017	1.17911096697659	0.045807374082367
ANXA5	1.25388295180425	1.1141438784985	1.41114849452315	0.0456438653143793
TEAD4	1.24387131275467	1.11310021307291	1.39000588134169	0.0452518547744015
MAP3K20	1.19189531968826	1.06495489544095	1.33396678035512	0.0450264969723111
HMGCS2	0.953824381149319	0.918014017944352	0.991031653429534	0.0446306016756423
FOXA1	0.928800127153107	0.87184637978353	0.989474403063782	0.0444652221640835
PALLD	1.1524568413891	1.0557999202105	1.25796256074706	0.0440165777102552
PARVB	1.17397778156085	1.03214114882181	1.3353055763466	0.0438105541263169
PRRX1	1.13144025416888	1.04333189173471	1.22698928202537	0.0435323934497784
C1S	1.08504066325377	1.00612320366225	1.17014818526081	0.0431117417377064
FAP	1.19767384143842	1.09436455113211	1.31073564926968	0.0424728007938605
FAM20A	1.13593910443606	1.01673922770232	1.26911366634591	0.0423532356133452
LY96	1.10754769785724	1.00474739958972	1.22086596445013	0.0415684311127632
ACP6	0.829543094878824	0.733794829635815	0.937784948147789	0.0415149040539715
MT1X	1.11797078905711	1.0327765859465	1.2101927001371	0.0414013240034409
ARFGEF3	0.888731794468972	0.799084390193783	0.988436530850636	0.0399581506975903
COL6A1	1.13551844062087	1.05298723271625	1.22451829322181	0.0398541682001515
THEMIS2	1.15157925021848	1.01944682151264	1.30083761266336	0.0379361522668706
FBP1	0.884140802940585	0.826383476306789	0.945934885965968	0.0377192968263827
F3	1.08214700988839	1.00725248784704	1.16261033369442	0.0372353007792673
CCDC80	1.20122462743509	1.10240243365239	1.30890549722021	0.0365622287209013
ZNF552	0.798459420173934	0.697714986080074	0.913750540527057	0.0361895985389042
KLHDC7A	0.904243030958343	0.827882230876625	0.987647069282951	0.0361487184704412
BHMT	0.941935762839536	0.892424232885392	0.994194183238904	0.0358947375275164
CD163	1.09069085595883	1.01007266740056	1.17774352446708	0.0357957943072076
CTHRC1	1.15044133042366	1.07541038469694	1.23070715475742	0.0355528878511932
STOM	1.13223413567705	1.02034476051697	1.25639312083383	0.0352529657518459
GFOD1	1.17659930373015	1.04270569326086	1.32768616349343	0.0352278581131097
IGF2BP2	1.09040124625604	1.01563483684698	1.17067161808655	0.0351978153244732
CAPN5	0.886681560969786	0.817239502102415	0.96202421510615	0.034390319686783
ZNF440	0.865307127284262	0.764186619853882	0.979808341412873	0.0342879181415372
GPR176	1.15452005436021	1.0106177848767	1.31891262539234	0.0342542143661092
TGFB1I1	1.13050821935663	1.01823088918177	1.25516604103409	0.034140424856818
SLC16A1	1.16516057896872	1.06756168971973	1.27168217804738	0.034065661175463
AEBP1	1.13602870186386	1.06299827031586	1.21407649240578	0.0339891256894122
MN1	1.15114	1.03414298020195	1.28137017509972	0.033449636682493
CDC25B	1.24482180077859	1.11489448367963	1.38989055769597	0.0330786898016061
GPX8	1.18972777228539	1.06758404449609	1.32584612840975	0.0329678784053749
CDK6	1.19414464775788	1.0804855200132	1.31975987956912	0.0329175117694525
ADAMTS2	1.17750626482609	1.06521239797889	1.3016380642353	0.0328519026857156
PLAUR	1.16752167037003	1.0464853064524	1.30255708549275	0.0327973542107044
COL5A3	1.18123651899533	1.07426706332144	1.2988573897948	0.0327095620082468
APCDD1L	1.14984	1.05296038935966	1.25563279448521	0.0322645157906881
EDNRA	1.23760168878302	1.11191390900492	1.3774968796364	0.0320631237243347
SRPX	1.12161722143539	1.04017333876443	1.20943802781446	0.0319813431954655
SNAI1	1.19236167263879	1.06237788071412	1.33824920886183	0.0318832217910071
MFAP3L	0.826979249942576	0.735868051881337	0.929371343255254	0.0317574964148461
DEGS1	1.27500034537318	1.13993080546467	1.42607417301884	0.0316599730658226
GAS6	1.13303154720654	1.03803226961597	1.23672502728665	0.0314495004396451
GPR160	0.884041184236983	0.808842572318291	0.966231059261782	0.0309711865848631
FER1L4	0.904469878936834	0.848353352837214	0.964298377755083	0.0307410653939061
PAPSS2	1.15388142754292	1.03577955299689	1.28544953892567	0.029961135426668
TYMP	1.09082237315105	1.00700642428493	1.18161455684041	0.0299068697931832
ATP8B1	0.888062288153354	0.795150229278057	0.99183097558334	0.0296784350639895
CLIC4	1.18307032290224	1.07436464390148	1.30277499066728	0.0293962273999831
MFGE8	1.21312891829574	1.08686859377429	1.35405676531218	0.0281861178072078
DEGS2	0.882331718402661	0.813847937966283	0.956578280759429	0.0281819830212847
TPM2	1.12032855740695	1.03735409469434	1.20993986813284	0.0279555349891871
TMEM158	1.18724442509562	1.09119661218418	1.29174642697911	0.0279285456363773
PMEPA1	1.18378417483507	1.08758552958891	1.28849174107681	0.0277913405605394
PHF19	1.19018007422968	1.04529492872108	1.35514730835486	0.0277770958307155
IFITM2	1.15098585981582	1.0362564586453	1.27841755623684	0.0273759544928681
CPXM1	1.11827636537823	1.03716669589184	1.20572906391698	0.0273005323183183
HTRA3	1.08241969349999	1.0067233094442	1.16380775321816	0.0267235887404309
NIBAN1	1.1296798653065	1.0376328381503	1.22989226165378	0.0267070759713632
PDGFC	1.20905421354886	1.08043592726001	1.35298360080216	0.0265853040124243
BCAS1	0.933795738577127	0.878387283786597	0.992699345129234	0.026211703940476
FLNC	1.11208982572668	1.04780452965049	1.18031917737303	0.0261621443554576
MMP9	1.09943249971239	1.03393392287265	1.1690803393562	0.0259647725069112
SLC39A14	1.21062575599465	1.06573327649999	1.37521718932424	0.0253456961163076
RBP1	1.14375249300959	1.0620461973895	1.23174469103238	0.024230143150135
SPINK1	0.9451603441478	0.91438669890253	0.976969675107678	0.0238595969767459
MSC	1.09104147581073	1.00233769145086	1.18759527062802	0.0236893867007342
SPON2	1.17415758969848	1.06972042546831	1.28879098933069	0.0235997897384232
TEKT5	0.79851813135675	0.691239143281469	0.922446612439358	0.0232255946860965
SLC16A2	1.18936210167593	1.05290834931481	1.34349984955816	0.0229936544180239
DTX4	0.832133582931241	0.735823529375242	0.941049412255018	0.0227798578165929
COL5A2	1.20518551147562	1.11235361691254	1.30576472713978	0.0227733731824514
LOX	1.27717087806786	1.15856755254576	1.40791570435442	0.0226814300326229
MYADM	1.17458457065352	1.07359717076803	1.28507130158544	0.0225973114692507
COL5A1	1.18573297470663	1.09904506911418	1.27925844609795	0.0225084870062025
SFRP2	1.08067462220496	1.0346145719149	1.12878522183997	0.0224903014786548
FSTL3	1.15185898362441	1.05365000591933	1.25922185801975	0.0224011959537527
GPC6	1.10940388403721	1.01141009392634	1.21689212447832	0.0223265925160479
LGALS1	1.19295779772054	1.08892478950284	1.30692984571688	0.0223238174502005
FBN1	1.32134425341384	1.19142781566679	1.46542712287831	0.0221551023126993
TMC4	0.896013525399538	0.821380612095702	0.977427791545398	0.0215338834950507
GAS1	1.08891762146146	1.0127986965485	1.17075741741193	0.0214389275052854
SPEG	1.10230736242657	1.00188821669535	1.21279150808627	0.0213551601606616
COL18A1	1.28068549347793	1.15031283284134	1.42583416126336	0.0213431212455082
COL8A2	1.11589872824883	1.02545725847806	1.21431679517825	0.0212267840328914
MSRB3	1.13589088993665	1.04621989398924	1.23324754313489	0.0209584054107102
CRYAB	1.13926748771987	1.05792577241465	1.22686339856634	0.0205321041353241
EIF5A2	1.13661637744567	1.00954800355582	1.27967841541701	0.0205005704933484
PRDM1	1.16402738202731	1.01672364092861	1.33267260793878	0.0204499696634499
SLC29A3	0.876534713112728	0.77082180732652	0.996745416371121	0.020000864219547
SORL1	0.903592511314707	0.828089222694906	0.985980017765351	0.0195336391322501
POSTN	1.11232665656048	1.04504868199327	1.18393584166348	0.0193679473922943
COL1A1	1.14847086674031	1.07427432506354	1.22779191588072	0.0193179056948523
ATP1A4	0.865640791746158	0.77995243803807	0.96074317328865	0.0192701961037569
VIM	1.14490750271294	1.04277694821727	1.25704081971638	0.0190481456547558
TIMP2	1.15735028093692	1.06640790312463	1.25604814898698	0.0188835030108291
PLA2G2F	0.941809863471093	0.888550979550613	0.998261033238683	0.0183726604193869
HTRA1	1.22158191290952	1.1075232772758	1.34738691327395	0.0176208167279416
ECM1	1.1851793722022	1.08068130217731	1.29978203700164	0.017057464087389
MAP1B	1.17600582481837	1.07178003168451	1.29036710810249	0.0169387644538175
PLEKHA4	1.11662558503724	1.00986115009895	1.23467735840474	0.0169040322029136
GLT8D2	1.14616878941814	1.03074424505667	1.27451877624989	0.0164986494162293
NFIL3	1.25469239319232	1.09443338923575	1.43841828750673	0.0163686263419565
CYBRD1	1.13118624985935	1.03404204330964	1.23745677475097	0.0163453423582987
ARL4C	1.21936380905601	1.09624706019154	1.35630749018912	0.0161032887916503
SUGCT	1.18683918508595	1.05442907821896	1.33587671314483	0.0157335768443007
SERPINE2	1.18795930989865	1.10057567406669	1.28228104184806	0.0155913034003405
CSPG4	1.17026321709043	1.0658529501076	1.2849014464299	0.0154723096633631
RGS2	1.1314307050185	1.04484964625106	1.22518626948078	0.0154617404255157
TCF7L1	1.13050647944862	1.01465954406635	1.25958003110424	0.0151746373672843
SULF1	1.0906231722033	1.01919667472516	1.1670553223376	0.0150064509793206
RHBG	0.910439987864158	0.837624264799676	0.989585672640853	0.0147539897784747
ZBED2	1.15436596068596	1.06162833403615	1.25520460265433	0.0146262038469047
PDLIM3	1.09098015529693	1.01048680289724	1.17788544673625	0.0145503433196998
ANXA2	1.28732070156971	1.13015107674131	1.46634783861667	0.0140763224255492
FERMT2	1.16870911525188	1.06039230438435	1.28809025718632	0.0139578890752623
GOLT1A	0.836649283100356	0.770706955805733	0.908233690690575	0.0135039464500463
PLEKHH1	0.832390116354829	0.737588779609762	0.939376146925372	0.0133426997730257
SSC5D	1.15021756062667	1.05015546696515	1.25981388317418	0.0128889814965969
FMOD	1.10475432721289	1.00811829645391	1.2106536780343	0.012487096109042
FN1	1.21183619936021	1.12319572616614	1.3074720103258	0.0124407310925977
KRT6B	1.07170573190375	1.03145192772424	1.11353049514336	0.0123520090677816
CYP4Z2P	0.864966028550606	0.757570831764889	0.987585845674163	0.012180692376916
SRCIN1	0.872054537294276	0.770649777906502	0.98680248514624	0.0121443338156515
RGS20	1.19281251865296	1.06544389983314	1.33540743428916	0.0120691825030539
PODNL1	1.14406690134923	1.02298006108855	1.27948639914844	0.0120671647106614
HEG1	1.14910704112972	1.02583881505874	1.28718758989276	0.0120407687372276
BTBD16	0.932606108749151	0.887516336236084	0.979986642009115	0.0118212008781254
EMILIN1	1.08510617073663	1.00484257661355	1.1717809626846	0.0117651863859308
LAMA4	1.15728331304726	1.03986498536841	1.28796015396473	0.0115583673402675
CYP4F12	0.899634996638518	0.843143237172388	0.959911781883047	0.0114713145008401
TWIST1	1.12224228986573	1.03413173228937	1.21786008284936	0.0113855872641289
CCN4	1.08599082572716	1.00898345889185	1.16887552830534	0.0111112542381485
TAGLN	1.13697094976992	1.06302991803618	1.21605508809088	0.011036156671821
TMC7	0.830799901128616	0.743639921326961	0.928175661257757	0.0109936077452097
TPM1	1.1429439811009	1.04532207607543	1.24968272825466	0.0109209273296467
FOXQ1	0.935929665172666	0.880721349877168	0.994599	0.0109154903266213
SRMS	0.886256093604657	0.786539493869339	0.998614652631628	0.0107316470079648
ANXA6	1.21818424550666	1.08551656411969	1.36706606333923	0.0106566404901307
ISLR	1.1197610253774	1.05150570459812	1.19245	0.0104375993403624
DPYSL3	1.14052749349383	1.06154986448711	1.22538093304151	0.0103519601556882
RRAD	1.08081187104472	1.00540594885109	1.16187327310533	0.0100555953982928
CD248	1.17994660961504	1.07492439039011	1.29522970544631	0.0100520984258805
FILIP1L	1.15059550550066	1.04907490314594	1.26194041370005	0.0099036120958987
S100A10	1.15669101293792	1.05801041294848	1.26457554957589	0.00988495780418674
SSH3	0.865155223501231	0.776589836202377	0.963820959094307	0.00967929368693837
PDGFRB	1.24422034377195	1.12854147464523	1.3717566422117	0.00954227743271546
PLEKHA6	0.860967542383135	0.777525312792982	0.953364600278447	0.00937483544165001
MRC2	1.12645730337034	1.00904004626806	1.25753785591506	0.00924967705250256
CDA	1.17682553874532	1.08783142246198	1.27310015140845	0.00921406697285897
GREM1	1.1019852813956	1.02343807679038	1.18656085595422	0.00910689664815884
OLFML2B	1.22087165508517	1.11769004279103	1.3335786677211	0.00904296089735013
NUAK1	1.18090547930709	1.05559502001516	1.32109	0.00895597906435842
COL6A3	1.13914072191848	1.05580322417615	1.22905628115079	0.0088794741037608
SOCS3	1.16664915276819	1.05369924572818	1.29170657677955	0.00883178789881538
GATA3-AS1	0.901066619173581	0.831080312644836	0.976946559599088	0.00870623960797839
AATBC	0.88717722702804	0.813404751858473	0.96764056314993	0.00867171250410996
LRIG1	1.15957010972167	1.05784470287522	1.27107772596989	0.0085705128003174
PTHLH	1.0916045738098	1.02765592844865	1.1595325950791	0.00856751584696787
ADA	1.14423934864394	1.03559061450616	1.2642869379513	0.0084261651338774
INHBA	1.13785928097602	1.0339792274504	1.25217577774344	0.0083786470305046
PPP1R3C	0.92152699714007	0.859135461850645	0.988449486916446	0.00832937201782118
SLC2A3	1.24768564921726	1.14239168681506	1.36268453038447	0.00825549270143257
ATF7IP2	0.853279905257915	0.762493179366487	0.954876209282138	0.00819172671572769
SELENOM	1.12062157380307	1.02852220601818	1.22096801053477	0.00812109433392752
PCOLCE2	1.2054253617597	1.0992764596094	1.32182426911044	0.00772911948490842
MFAP5	1.1687906773711	1.09268977844904	1.25019165956561	0.00760793864208879
CPVL	1.12111716514291	1.02507414898565	1.22615880931329	0.00744816379087197
DGAT2	0.878361487633061	0.793420058358033	0.972396519132132	0.00713098476510745
TREM1	1.11019747184993	1.00290480935169	1.22896850728907	0.00698770316356307
DSG3	1.08728649690394	1.03851063255055	1.13835322364125	0.00695206304313879
SCARF2	1.23615814113231	1.1036730610038	1.38454675019237	0.006907708796421
MEDAG	1.1013719897977	1.00549499351579	1.20639114837312	0.00689269165819404
UBE2E2	1.11324936434463	1.01518011413295	1.22079237955938	0.00688005493846431
TENT5B	1.11287618934431	1.02782071170114	1.20497028198594	0.00675192747222824
HMGA2	1.16383913497621	1.04908639823685	1.29114392711474	0.00666796975524577
BEND5	0.83570652421546	0.744162539428365	0.938511894394432	0.00666329093440299
MYO1B	1.14718525577806	1.02554864011447	1.28324875056894	0.00658151451211653
EVA1A	1.1461189041217	1.0385887105439	1.26478222712165	0.00658111995641861
FKBP10	1.16885928632709	1.06687531841211	1.28059203137863	0.00647881699347584
PRR15	0.911236156284644	0.839302602766361	0.989334871336697	0.00629479763114692
PLK2	1.15595369155739	1.04537	1.27822936971083	0.00617688926031566
KRTAP5-9	0.846462134760686	0.755509486301658	0.948364194725063	0.00601727053913763
EGR2	1.21010046498887	1.09409681338909	1.33840361972201	0.00592422395859806
ADAMTS4	1.18909118883393	1.07841937189738	1.31112060132487	0.00582577935536375
GEM	1.1306741434016	1.04267598113342	1.22609903909675	0.00578845870185859
TMEM163	0.899048281952722	0.814681129110333	0.99215237029588	0.00570209773072483
EMX2	0.864015993200933	0.79104261168249	0.943721141544061	0.00570175883698651
MAOA	0.912653313507757	0.84800717176695	0.982227625411636	0.0056691396165174
OVGP1	0.838963688616872	0.745682354773703	0.943914075895268	0.00558332688825892
CASQ1	0.914783831853413	0.847321915345696	0.987616918510834	0.00554303469248263
DPYSL2	1.2490571011383	1.11551033611099	1.39859182958641	0.00546777041766912
SIGLEC15	0.82498563103528	0.736270314657558	0.924390509661155	0.00542973755026039
GPRC5C	0.879493216295944	0.809152628378849	0.955948594099386	0.0054201595275477
TNFSF9	1.12288321962173	1.02638460329929	1.22845444179018	0.00528426913475306
CCN2	1.14843581778946	1.06981729204833	1.23283184650764	0.00522182578587517
TMEM45A	1.14473581691854	1.06929299468138	1.22550142669421	0.00518351086316987
PTPRR	0.874271704852305	0.800944415774328	0.954312183032583	0.0050573383977149
CCN1	1.15479350252677	1.06438	1.25289082535634	0.0049667066910849
RCN3	1.22277632084568	1.11558928261962	1.34026200691882	0.00492552105481931
IL27RA	1.11904060008752	1.00046114867013	1.25167465654094	0.00483265863238443
LRRC32	1.23630736689767	1.11147575322366	1.37515901810039	0.00472877699632383
SORCS2	1.18698138667259	1.06915169594613	1.31779692035225	0.00470541723317875
CHRDL2	1.0790780801652	1.01026066990856	1.15258322705804	0.00466780553004898
ADAM12	1.12270705231215	1.0291778438904	1.22473597036129	0.00453845586006299
MCUB	1.20038196589157	1.07024725722294	1.34634016047524	0.0045310591763365
ADAMTSL4	1.17190062849135	1.06702950409776	1.28707882751533	0.00448646907911815
CDH23	0.871554670925648	0.777056427728706	0.977544895462233	0.00443179428033509
ST3GAL5	0.837952160759903	0.763066137219339	0.920187372330425	0.00432127265667656
DCN	1.10622594639791	1.03056890106573	1.18743719436756	0.00425251233748811
CRISPLD2	1.17406657459814	1.06908222877005	1.28936042943533	0.00419574744273354
CCL2	1.10661651947218	1.01835258183867	1.20253058028062	0.00417337971896205
LMCD1	1.15888202929455	1.04769416447286	1.2818698465287	0.00416585377366899
SYNM	1.07071260227398	1.00313868963991	1.14283846142934	0.00405202343231639
FHL1	1.08658789486006	1.01689449404721	1.16105776967813	0.00399974332065573
SGK1	1.10066144294987	1.00374680040724	1.20693347316771	0.00384740159494102
MXRA8	1.22063175585008	1.11295883524044	1.33872146589121	0.00380280260225954
TBX2	0.931447708166596	0.868962015590179	0.998426648671809	0.00366919774293926
PCOLCE	1.14469166908779	1.03222226428742	1.26941557318912	0.00361574467512774
KLF9	1.13220734124667	1.01853459957735	1.25856643859206	0.00352139286594079
PLPP4	1.12692952956919	1.0230222423982	1.24139057000163	0.00351296981626177
PRRX2	1.11294823174212	1.0069114103679	1.23015168343889	0.0035029695228529
ANGPTL2	1.11105168898688	1.01575577359797	1.21528805219391	0.00341010214873569
P2RY6	1.12848294388797	1.03721627551001	1.22778034313036	0.00335696988327317
COL3A1	1.13880790062296	1.06362222260044	1.21930832861929	0.00329477921819555
CAV2	1.12743445554423	1.01685054063455	1.25004452547676	0.00319239329777435
DCBLD2	1.21609531740975	1.10280545601096	1.34102330829529	0.00316746288606214
THY1	1.20822952199607	1.09540939842303	1.33266939276258	0.00300962237001097
UGT1A1	0.823190837006755	0.735166659536006	0.921754469332941	0.0029877400966405
KLK10	1.08910010962955	1.01966049406483	1.16326861313082	0.00296950391960527
IL20RB	1.07152440617081	1.00479355642613	1.14269	0.00296454022032272
PLAU	1.10740608875567	1.01836427191733	1.20423337623994	0.00294239542211333
CTSK	1.12346441486982	1.02713709347214	1.22882553799331	0.00291548449813771
COL1A2	1.14283464635716	1.06522728965313	1.22609610324534	0.0028448614593929
CPA4	1.14149	1.06580853419466	1.2225489200006	0.00283137267921856
PTX3	1.09311127751596	1.01002199218416	1.18303588860341	0.00282210206479916
CXCL12	1.1308545509351	1.0441424322162	1.22476778637976	0.00281331854851496
CPA3	1.11970646676615	1.0353460395265	1.21094061681187	0.00274596449128952
CNN1	1.06840860812513	1.01668873422152	1.12275951871339	0.00271160844131775
MT1A	1.12672624032746	1.04249950278372	1.21775791475445	0.00265293770308209
FNDC1	1.12264527518646	1.04663716332929	1.20417319206347	0.00264468615674946
THBS1	1.14143950976839	1.04441829640412	1.24747350649263	0.00263227149802405
PRNP	1.15790715261239	1.05109005724577	1.27557954223652	0.0026309461930655
COL15A1	1.17984	1.07002698486953	1.30092735120302	0.00261320789921225
TESC	0.908683209445462	0.853062612654938	0.96793032876955	0.00257955962449133
CCDC8	1.10744833535228	1.00829038506315	1.2163577414236	0.00257330896754684
PI3	1.05999984347714	1.02381362538734	1.09746504667435	0.00253417982992567
HSD17B2	0.888162745653839	0.827824241184005	0.952899206767766	0.0025178039015215
SLFN11	1.16712014422554	1.06071610487612	1.28419793457942	0.00248797656218887
VCAN	1.14066911065264	1.05453223002613	1.23384187125778	0.00243004917887614
ACSL5	0.895424941287344	0.822008016914741	0.975399033806023	0.00242916169211926
FABP6	0.90639125739009	0.850284125084734	0.966200693669682	0.00239049795571608
KRT14	1.0552362237492	1.01875209112226	1.09302694700318	0.00239046624157709
OLFML2A	1.14098635756408	1.02936450570478	1.26471221897825	0.0023650038613011
TLE2	0.880999403991737	0.805490357836015	0.963586891243471	0.00231046264897456
MECOM	0.88609222152925	0.808516943950162	0.971110662466265	0.00224855331096839
S100A8	1.0859838714333	1.04404063812302	1.12961212997755	0.00223832079041565
CPXM2	1.10890763841351	1.02877516573237	1.19528172091562	0.00221798763882556
ANXA1	1.20510290014418	1.11364539127448	1.30407130610391	0.00221164783152669
C4orf19	0.880936767297705	0.801189933368231	0.968621241550541	0.00212344475709332
LDLR	1.26878574034822	1.14691333763023	1.40360845243741	0.00187646537118414
PKIA	0.909884469498318	0.832255013164652	0.994754894519871	0.00187508357371886
ENTPD3	0.916189420711787	0.846247858199383	0.991911585348356	0.00187240470086772
RASL12	1.12411310534725	1.02757675836464	1.22971862036319	0.00181134197870759
IER3	1.10581681844093	1.00212927063735	1.22023263043608	0.00179848978602442
ACTG2	1.0922031650784	1.03836890492612	1.14882846370689	0.00177179434630211
TM4SF1	1.21017555158515	1.12220687420145	1.30504000583365	0.00176410227008544
DES	1.04701089626839	1.00869408231587	1.08678323400876	0.00175708071232783
TNFAIP2	0.914257936922828	0.838457836795812	0.996910683571967	0.00169271420388293
BGN	1.18401544529894	1.08738240982778	1.2892360240851	0.0016800826486053
CDH11	1.1378263705633	1.03768094781136	1.24763671558187	0.00167098470671809
ACTA2	1.14418762981389	1.06651911122322	1.22751230469524	0.00159409684499839
FIBIN	1.1207746197921	1.01534689426164	1.23714934813839	0.00157572026863019
PCSK9	1.10409744046265	1.01537881514617	1.20056784704601	0.00153235749361546
CNTN1	1.13888044169222	1.05007089192465	1.23520104256173	0.0015319092753153
CILP	1.09598556511724	1.02344868341124	1.17366349521473	0.00149898068668198
PLN	1.07663214661298	1.00095873440824	1.15802653923165	0.00147545882146068
ASPN	1.11589906172308	1.03990023562643	1.19745209520442	0.00144617659067821
HSPB7	1.08795805401038	1.01196731410042	1.16965509734694	0.00142354308319419
PHGR1	0.88424177391214	0.818270232221098	0.955532150557351	0.00139646637251211
SERPINF1	1.14976583248551	1.05602344017181	1.2518296651976	0.00139123708041334
CAPN13	0.915456820938769	0.83896655663797	0.998920856108637	0.00137723251810193
UCHL1	1.11302672757013	1.04649395302383	1.18378944541999	0.00131130175153238
CRTAC1	0.907693764509853	0.857737434357102	0.960559650457148	0.0012991021566249
EMP1	1.35048483473592	1.22381332595237	1.49026755157485	0.00121930108033773
GATA2	0.893769394924916	0.819721470061817	0.974506293270822	0.00116801701705718
FOSL1	1.17240719901037	1.06756216707561	1.28754903712695	0.00116081309309423
SLITRK6	0.933307343729634	0.879652573705208	0.99023480848881	0.0011371587629384
HAS2	1.10304075478408	1.0106736987015	1.20384938113837	0.00109854617315344
SERPINB4	1.05315026091864	1.00324164869469	1.1055416942828	0.00107279682328767
SPARC	1.17708208673594	1.06872465512505	1.2964258214409	0.00107111574475531
BCAT1	1.1598127571181	1.06634387364778	1.26147452507258	0.00104532421603606
TGM1	1.09963620366221	1.02461654394067	1.18014860052334	0.00103533593057105
SERPINB2	1.15354323840351	1.08837796357004	1.22261020289469	0.00101844502200797
LIMCH1	0.889748939404389	0.810162755966843	0.977153256355857	0.0010091798547213
POU5F1	0.877921909921133	0.794749071996408	0.969799031011708	0.000975487740961345
MYC	1.12694844449793	1.02564340604058	1.23825960277861	0.000963275495161455
MRGPRF	1.08960284099928	1.00291819615402	1.18377984931024	0.000959936611612426
SNAI2	1.09564699996555	1.00007926144656	1.20034720727749	0.000956179210693243
LRRC15	1.11675855571219	1.02977077570182	1.21109445051633	0.000953051301857721
COL12A1	1.13279175958135	1.03749483914012	1.23684197951187	0.000939258365926199
STMN3	1.18290521590203	1.07561927582245	1.30089222205348	0.000936603799814644
ACTC1	1.05410391981167	1.00350194136216	1.10725752284453	0.000918361862814332
SOD3	1.11882372382691	1.03152663850293	1.2135086756602	0.000911983480836665
SERPINB7	1.22236246600699	1.13130068610215	1.32075408126091	0.000907234926542657
SOX9	1.09233652781854	1.01439488938824	1.17626685868483	0.00087544118789929
MOXD1	1.14229102621873	1.04569061906473	1.24781533351317	0.000863972864266607
MAFB	1.10431235996148	1.00107840851597	1.21819207965091	0.000839069626449381
KRT6C	1.07472002180056	1.02261215598302	1.12948307772528	0.000825215498507911
DUSP1	1.11785959775791	1.02497932539483	1.21915637646457	0.000808936758546221
MMP2	1.09907476537535	1.00361552822631	1.20361364079302	0.000798949961529622
FAM3D	0.889157088522329	0.826064720275771	0.957068264343226	0.000794359762145712
TBX1	0.907695249879053	0.843598758813983	0.976661781498274	0.00078603821940414
FGFBP1	1.08733740343856	1.03899572834361	1.13792828657858	0.000780632451621814
EHF	0.90924102426052	0.833155278485944	0.992275103508531	0.000776994753334494
CYP3A5	0.906309437752331	0.833486798038303	0.985494669972205	0.000746185359333522
SFRP4	1.08655690412428	1.02917251024963	1.14714092549341	0.000730117836491016
SPP1	1.07678644159859	1.0138238295528	1.14365928972294	0.000693106895649488
COL10A1	1.10825177740643	1.04033087079613	1.18060709011221	0.000691809722823278
SERPINE1	1.14041737337234	1.05558172831262	1.23207114201232	0.000661524228105346
HES2	1.14565234855682	1.07000045148253	1.22665303732835	0.000657682670385261
BHLHE41	0.824258150839754	0.755113546769358	0.899734221604803	0.000629475246428194
ZNF737	0.907840682104906	0.830444031506573	0.992450632211182	0.000626385718056683
MMP11	1.11456663451916	1.04906157723916	1.18416	0.000623401378413126
SERPINB13	1.0805365076163	1.02067429794897	1.14390961606247	0.000617078561725305
ID1	0.919845993414386	0.852348225840156	0.992688933876157	0.0006154909726037
IFI6	1.10372945816395	1.02747429130514	1.1856439884948	0.000583541095922128
LUM	1.10757428679926	1.03264547939189	1.18793993220335	0.000569951589446062
COL8A1	1.19316257568079	1.09143909585538	1.30436681021535	0.000560838830670094
CASQ2	1.07525205131437	1.00469574583163	1.15076328197126	0.000543458830968898
EGR1	1.13609426320992	1.04545556758321	1.23459113416197	0.000541169144982361
FBLN2	1.10092649992887	1.01556990910295	1.19345713907201	0.000540659749518099
COL11A1	1.13745750245846	1.05621812785172	1.22494543104516	0.000534801608465162
RBPMS2	1.09209330152021	1.00946644676281	1.18148333017903	0.000511593909156164
SERPINB3	1.05693651556923	1.01128937322232	1.10464405888506	0.000507277934478598
CTSE	0.883994639725269	0.834887651336094	0.935990036279058	0.000503183468732767
HSPB6	1.0946869221686	1.02504208997423	1.16906366020257	0.000480847486052
PTGIS	1.07244306191199	1.00831158708461	1.14065348030822	0.000470421471911333
S100A9	1.09219902770652	1.04099686369277	1.14591960622383	0.000465570989685032
RHCG	1.0728913361358	1.01945440995574	1.12912927533976	0.000461773286168644
CALB2	1.11299112461453	1.03028592421123	1.20233540453257	0.000451137753509916
KLK5	1.08969543735103	1.0303294412014	1.15248201080139	0.000448402277027095
SFRP1	1.11781452696853	1.04242030155942	1.19866172486537	0.000423303197309231
SPON1	1.09656480965504	1.01805999299054	1.18112330319709	0.000415119066100711
COMP	1.13989307819274	1.07858819634548	1.2046824117993	0.000392090162700664
DSC2	1.16829251335984	1.08744842695454	1.25514678484124	0.00038255615811903
SPRR2A	1.09624955574671	1.04719975510545	1.14759680053004	0.000353608040388762
CCL11	1.11698855093632	1.03384523643007	1.20681836986652	0.000352094345352457
SHH	0.894376633727494	0.822635922917399	0.972373732623931	0.000328989085717907
ADGRF1	0.910714073103117	0.84210183308771	0.984916657771582	0.000318122818555142
HAS3	0.922847130218536	0.862938613300719	0.986914726755662	0.00030909346444518
GDPD2	0.920011512006375	0.848115058586896	0.998002775277375	0.000307800901629979
PCP4	1.05596133442483	1.00448895965711	1.11007127463192	0.000260096676529568
SLC44A4	0.939921002035231	0.888206483207659	0.994646522818011	0.000246933004375027
IGFBP3	1.08178240724912	1.00302758691092	1.16672082792638	0.000245936640622077
EPHB6	0.915585955244053	0.852428404481399	0.983422932686257	0.000238191748249141
KLK6	1.13316730293739	1.06483549684293	1.20588404523841	0.000228164299007019
THBS2	1.10510557617978	1.03335984858703	1.18183257862549	0.000214422081999569
KLK7	1.13371334692783	1.06155637800182	1.21077502772076	0.000208077020010637
MYH11	1.08164222683411	1.02860405790389	1.13741521616667	0.000198795770834182
SPRR2E	1.09784270382612	1.04067551044827	1.15815024975949	0.000198386907373086
KRT16	1.08560082491787	1.03896779853483	1.1343269278647	0.000191540135715135
KLHDC7B	1.07107437646794	1.01087210596323	1.13486198022355	0.000183782150659926
MSLN	1.08146266824936	1.02237793636801	1.14396199410551	0.000182914358922941
MFAP4	1.09342978533124	1.02331137615314	1.16835278421708	0.000179062326701605
S100A7	1.06816556201332	1.03135665728207	1.10628816890371	0.000174835752670209
ARL14	0.919824307890293	0.852272655039085	0.992730146137395	0.000172943284468122
IGFBP5	1.07621557700784	1.00978139674858	1.14702050555078	0.000168514221219252
SPINK4	0.881863433361324	0.808913734650523	0.961391903471396	0.000165886909353278
TAC3	1.05335934884181	1.00161179781863	1.10778039976058	0.000161971924584445
DSC3	1.06507720056921	1.0131078916711	1.11971237466248	0.000156302116839805
OLR1	1.07570937350392	1.00107429899449	1.15590886451332	0.000155588953695891
GABRP	1.07780140114904	1.01884461058046	1.14016980436007	0.0001507188286033
ALDH1A1	1.1000042565335	1.03427313973157	1.1699127802022	0.000143757969322569
SPRR1B	1.08710887265046	1.04292086753933	1.13316910014823	0.000131673065929822
SBSN	1.09206463313101	1.04255576798846	1.14392457416125	0.000130633290552377
ANXA10	0.944083003489885	0.901237132747891	0.988965817199423	0.000117839164418312
CALML5	1.05444294103481	1.01165011675248	1.09904590281403	0.000115885780742162
ADIRF	0.968813280019919	0.950595155751582	0.987380554028655	0.000113922111615253
TOMM6	0.962421923857309	0.940434776591473	0.984923125533852	0.000102563642824815
C19orf33	0.962614091783039	0.941094588636156	0.984625669819398	0.000101889765770223
RN7SK	0.962118516074769	0.939112274029501	0.985688361842066	0.000100862740337514
